# Supplementary figures and images for: The Immune Microenvironment Landscape of Pituitary NeuroEndocrine Tumors, a Transcriptomic Approach
Source: MDPI journal article supplement (doi:10.3390/genes15050531), 2024-04-24

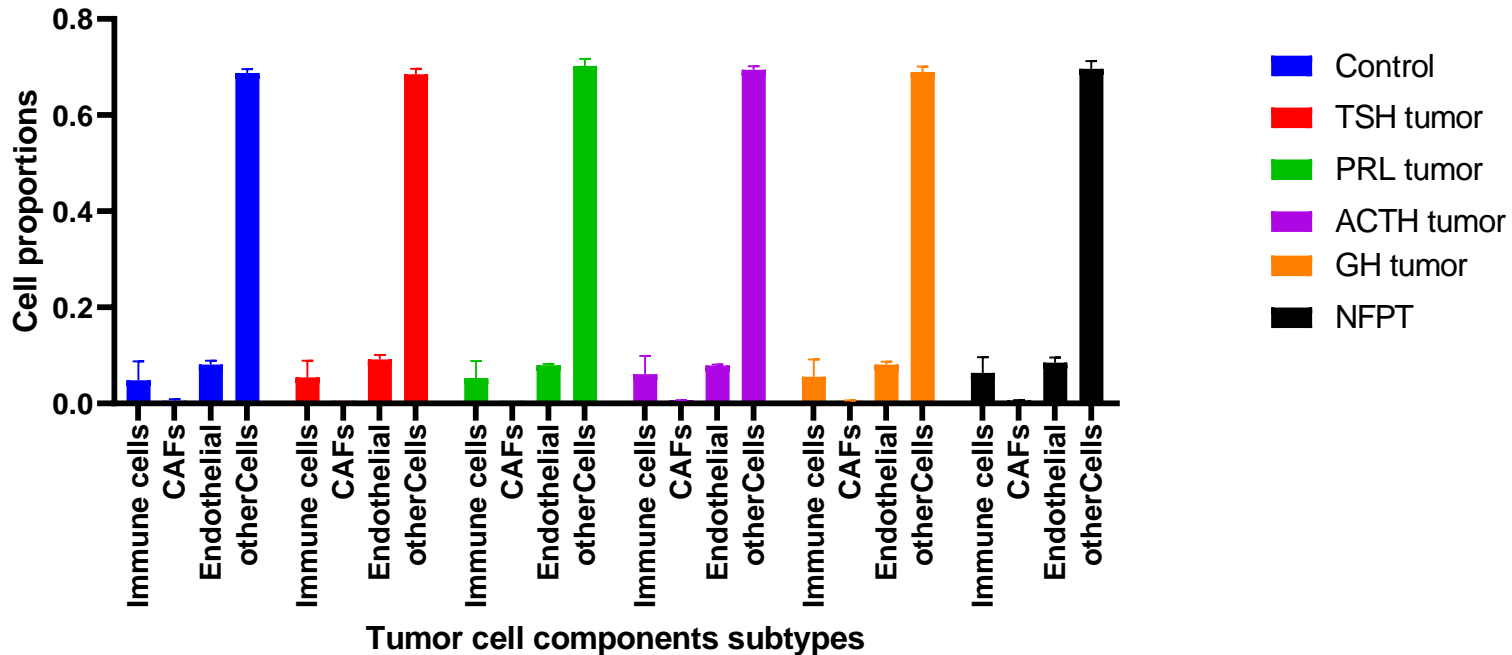

Supplement: s1 [file s1]
